# Supplementary material for: WDR5-H3K4me3 epigenetic axis regulates OPN expression to compensate PD-L1 function to promote pancreatic cancer immune escape
Source: PubMed Central journal article supplement — J Immunother Cancer. 2021 Jul 29;9(7):e002624. doi: 10.1136/jitc-2021-002624 (PMC8323468; doi:10.1136/jitc-2021-002624), 2021-07-29
Supplement: jitc-2021-002624supp001.pdf [file jitc-2021-002624supp001.pdf]

## Supplemental Data

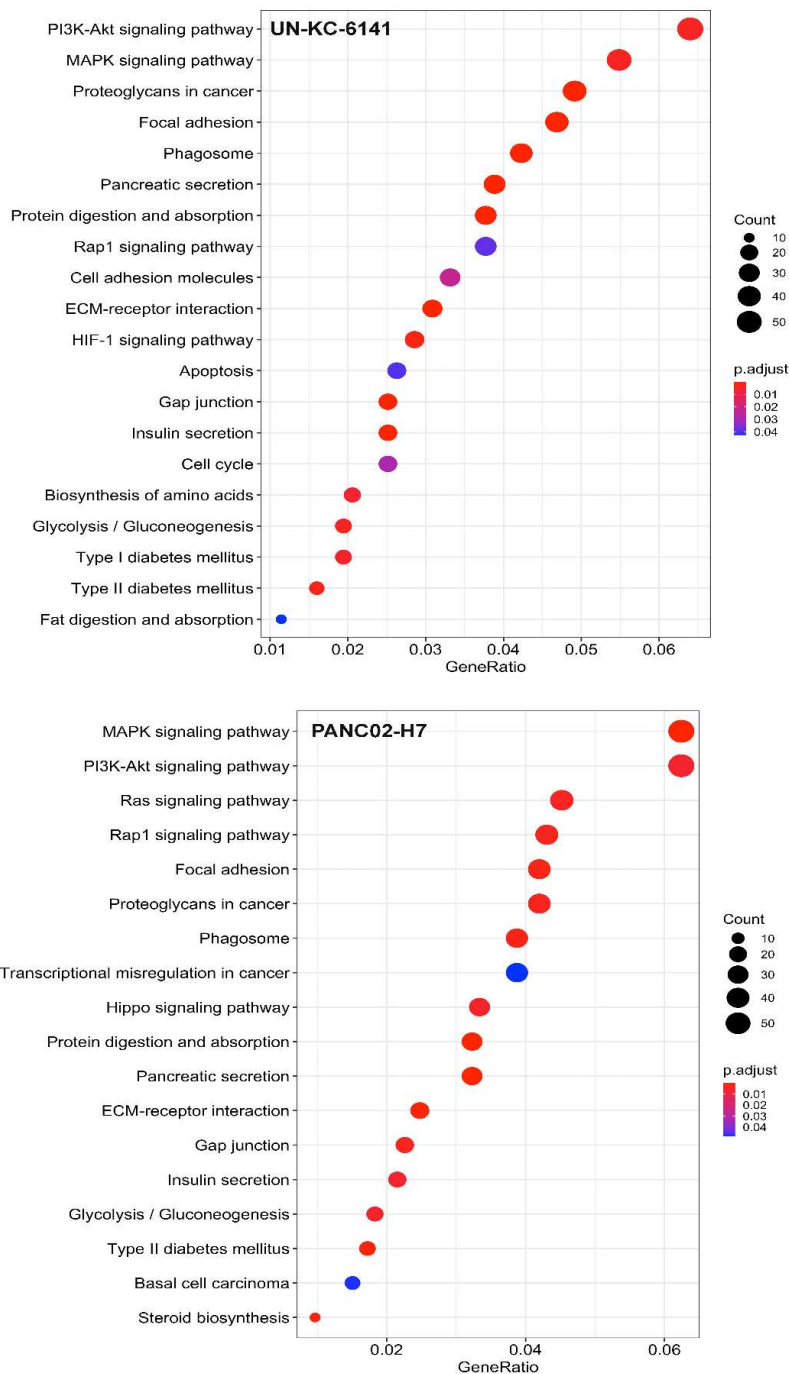

**Figure S1. KEGG pathway enrichment in pancreatic carcinoma in vivo.** The differentially expressed genes between normal pancreas and the two orthotopic pancreatic tumors were analyzed for pathway enrichment using R package clusterProfiler. Benjamini-Hochberg (BH)-adjusted p-value <0.05) was used as cutoff value.

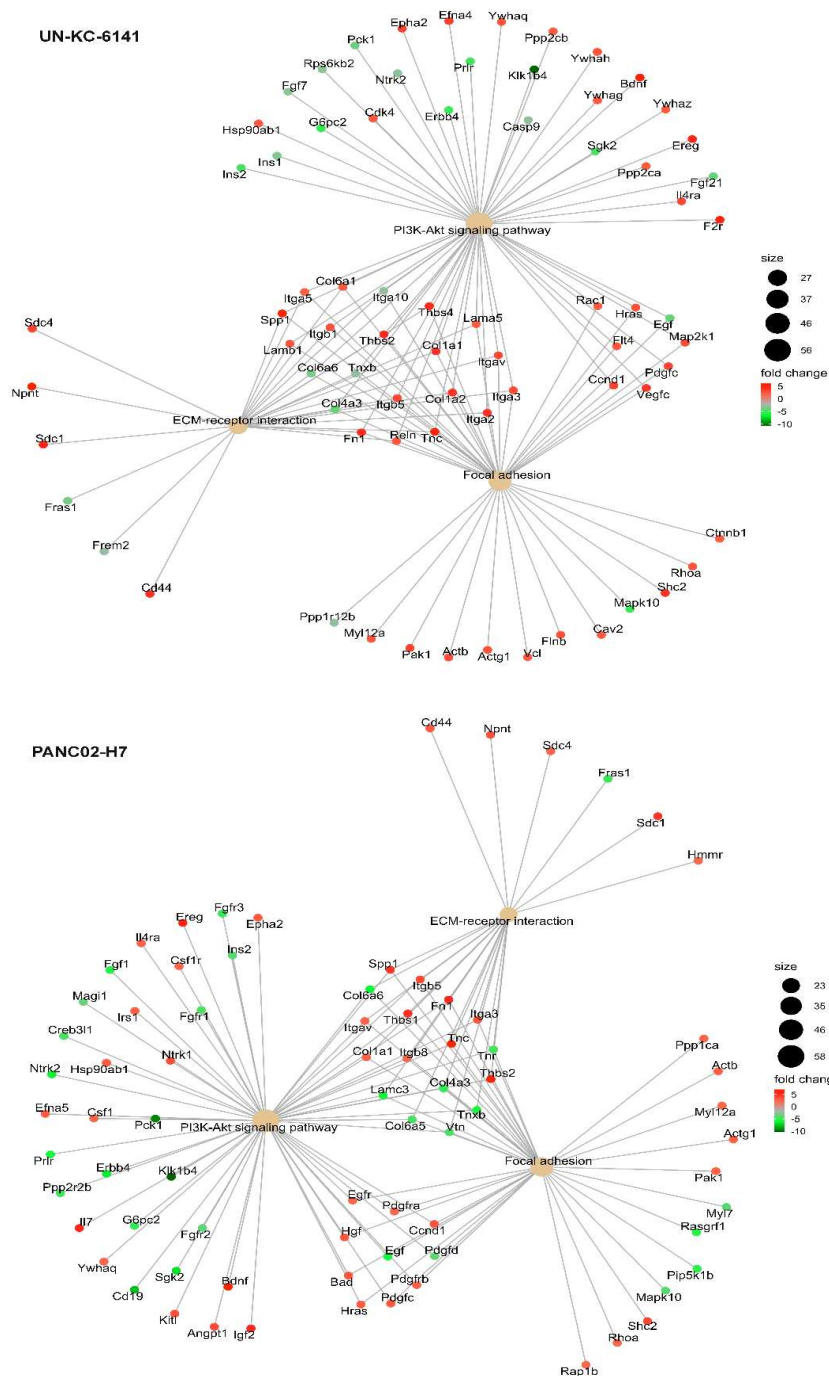

**Figure S2. Differentially expressed genes in KEGG pathway.** The differentially expressed genes between normal pancreas and the two orthotopic pancreatic tumors in the three indicated pathways are shown in cnet plots generated by clusterProfiler.

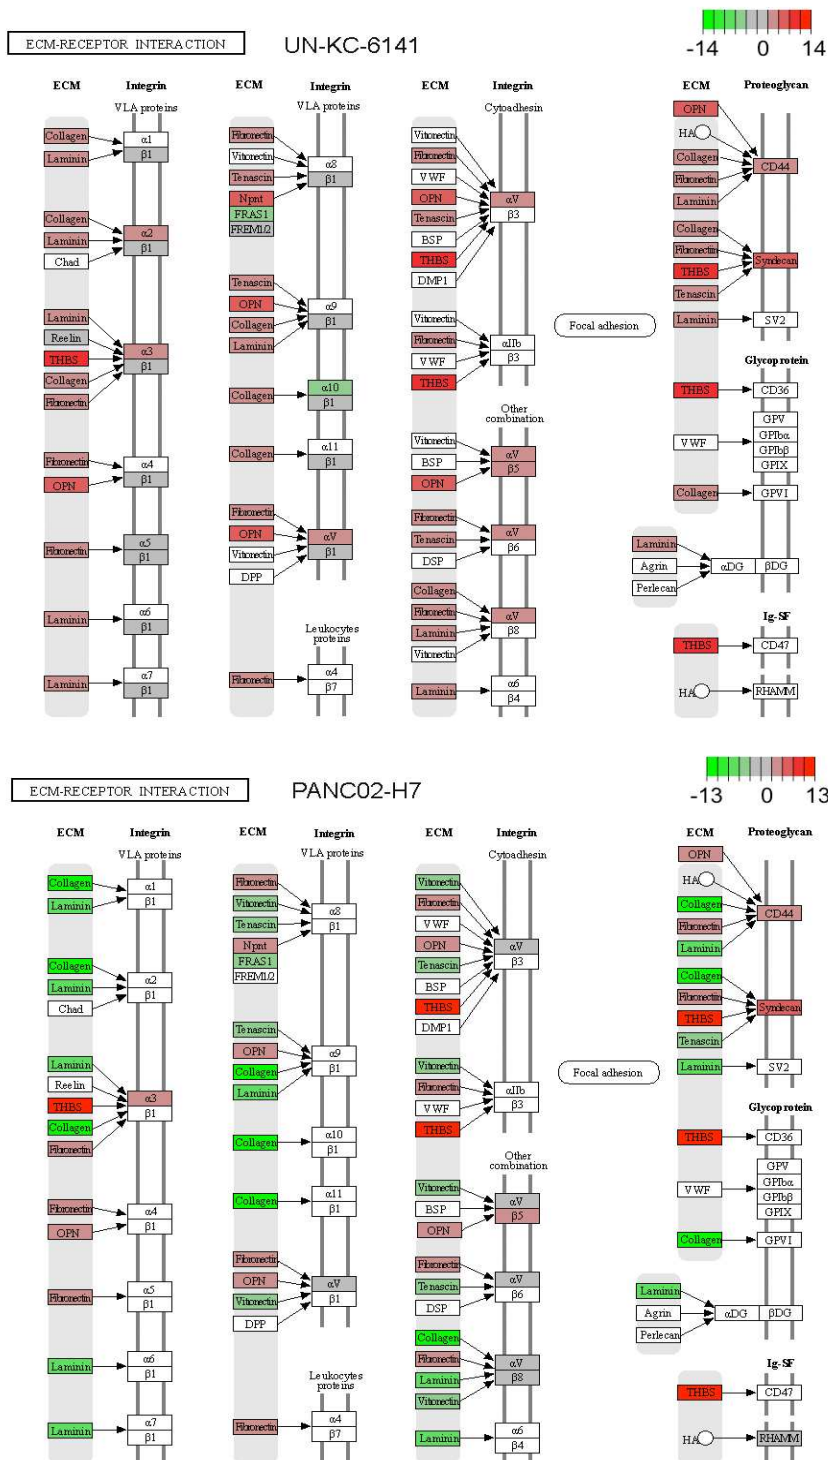

**Figure S3. ECM-receptor interaction map.** The differentially expressed genes were mapped to their respective ligands or receptors using R package pathview. Red color indicates up-regulated genes in tumors and green color indicates down-regulated genes in tumors.

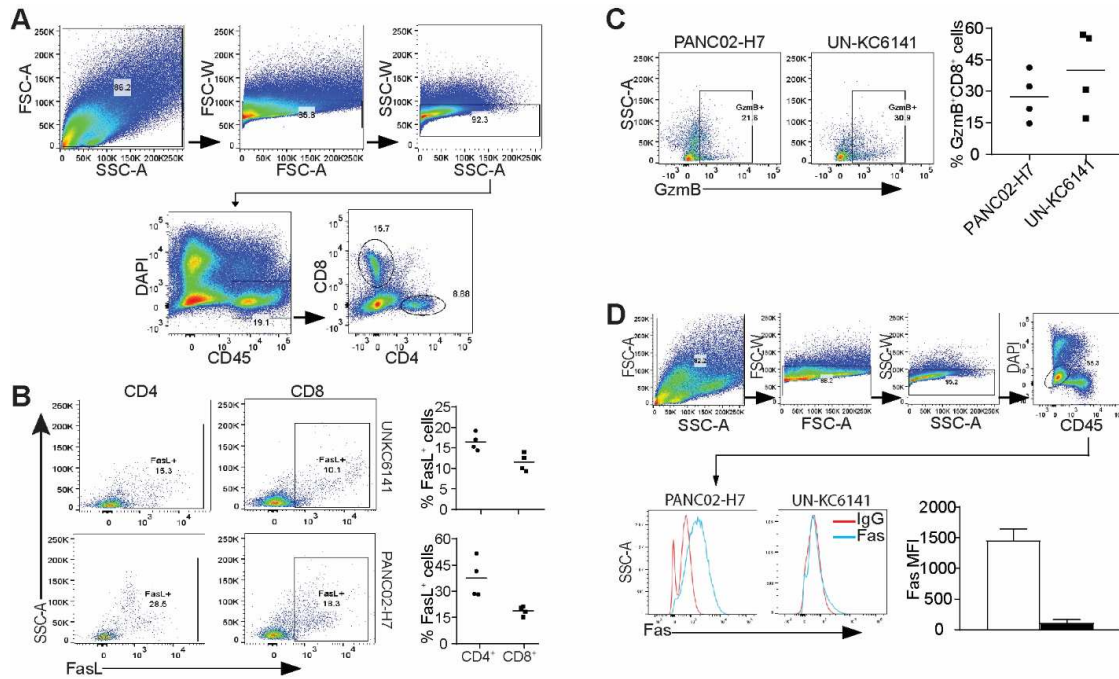

**Figure S4. T cell effector and tumor death receptor expression in pancreatic carcinoma. A.** The orthotopic UN-KC-6141 and PANC02-H7 tumors were collected from tumor-bearing mice and processed for analysis of tumor cells and tumor-infiltrating immune cells. Shown is gating strategy. **B.** FasL expression in T cells as gated in A was analyzed by flow cytometry. The % FasL<sup>+</sup> cells were quantified and presented at the right. **C.** Gzmb expression in tumor-infiltrating CD8<sup>+</sup> T cells was analyzed and quantified. **D.** Live tumor cells were gated and analyzed for Fas expression level in the two tumors. The Fas MFI is quantified at the right panel.

**Table S1. Normal human pancreas**

| Patient       | Tissue          | Age | Race  | Sex    | Patient diagnosis          | Treatment prior to tissue resection |
|---------------|-----------------|-----|-------|--------|----------------------------|-------------------------------------|
| 15-01-A072d-1 | Normal Pancreas | 40  | Black | Female | Cholangiocarcinoma         | None                                |
| 15-01-A076c-1 | Normal Pancreas | 62  | White | Female | Neuroendocrine tumor       | None                                |
| 15-02-A084a-b | Normal Pancreas | 22  | Black | Male   | Adrenal cortical carcinoma | None                                |
| 15-03-A038c-1 | Normal Pancreas | 73  | White | Male   | Adenocarcinoma of pancreas | None                                |
| 15-05-A033d-1 | Normal Pancreas | 63  | Black | Male   | Adenocarcinoma of pancreas | None                                |

**Table S2. Human pancreatic tumor tissues**

| Patient       | Diagnosis of Samples       | Age | Race  | Sex    | Treatment prior to tumor resection |
|---------------|----------------------------|-----|-------|--------|------------------------------------|
| 15-01-A016c-1 | Adenocarcinoma of pancreas | 70  | White | Female | None                               |
| 15-02-A095i-1 | Adenocarcinoma of pancreas | 74  | White | Male   | None                               |
| 15-05-A070a-1 | Adenocarcinoma of pancreas | 69  | White | Female | None                               |
| 15-05-A085e   | Adenocarcinoma of pancreas | 70  | White | Female | None                               |
| 15-08-A037d-1 | Adenocarcinoma of pancreas | 53  | White | Male   | None                               |

**Table S3. Patient survival and OPN expression level**

| Patient      | Days | Status | OPN Expression | Cutoff |
|--------------|------|--------|----------------|--------|
| TCGA-3A-A9IR | 1542 | Alive  | 29.95          | Low    |
| TCGA-FB-AAPP | 485  | Dead   | 202.4          | Low    |
| TCGA-3A-A9IS | 998  | Alive  | 237.62         | Low    |
| TCGA-3A-A9IN | 2084 | Alive  | 373.56         | Low    |
| TCGA-US-A776 | 1216 | Alive  | 376.78         | Low    |
| TCGA-FB-AAPU | 381  | Dead   | 553.8          | Low    |
| TCGA-2J-AABA | 607  | Dead   | 1021.45        | Low    |
| TCGA-3A-A9IV | 1103 | Alive  | 1071.98        | Low    |
| TCGA-HZ-7289 | 661  | Dead   | 1106.12        | Low    |
| TCGA-2L-AAQE | 684  | Dead   | 1178.87        | Low    |
| TCGA-3A-A9IO | 1942 | Alive  | 1196.95        | Low    |
| TCGA-3A-A9IJ | 1854 | Alive  | 1211.86        | Low    |
| TCGA-Z5-AAPL | 467  | Alive  | 1747.58        | Low    |
| TCGA-3A-A9I7 | 1323 | Alive  | 1780.22        | Low    |
| TCGA-FB-AAQ0 | 473  | Dead   | 1982.29        | Low    |
| TCGA-HZ-A49I | 308  | Dead   | 1987.07        | Low    |
| TCGA-2J-AAB8 | 80   | Alive  | 2047.47        | Low    |
| TCGA-HZ-8637 | 517  | Dead   | 2324.37        | Low    |
| TCGA-S4-A8RM | 737  | Alive  | 2338.05        | Low    |
| TCGA-3A-A9IL | 2741 | Alive  | 2357.64        | Low    |
| TCGA-IB-AAUR | 338  | Alive  | 2394.05        | Low    |
| TCGA-XD-AAUH | 395  | Alive  | 2513.79        | Low    |
| TCGA-LB-A7SX | 393  | Dead   | 2564.77        | Low    |
| TCGA-3E-AAAZ | 2182 | Dead   | 2703.07        | Low    |
| TCGA-IB-AAUP | 431  | Alive  | 2737.21        | Low    |
| TCGA-XN-A8T5 | 720  | Alive  | 2892.13        | Low    |
| TCGA-IB-A5ST | 635  | Alive  | 2998.69        | Low    |
| TCGA-Q3-AA2A | 95   | Alive  | 3041.82        | Low    |
| TCGA-HZ-A4BH | 194  | Alive  | 3250.78        | Low    |
| TCGA-FB-A7DR | 353  | Dead   | 3271.69        | Low    |
| TCGA-2J-AABP | 463  | Alive  | 3283.53        | Low    |
| TCGA-F2-6879 | 334  | Dead   | 3904.59        | Low    |
| TCGA-HZ-A4BK | 657  | Alive  | 4019.77        | Low    |
| TCGA-2J-AABI | 969  | Alive  | 4062.77        | Low    |
| TCGA-HZ-8519 | 454  | Alive  | 4161.49        | Low    |
| TCGA-US-A77G | 12   | Dead   | 4324.97        | Low    |
| TCGA-HZ-7925 | 614  | Dead   | 4511.45        | Low    |
| TCGA-IB-A7M4 | 483  | Alive  | 4636.06        | Low    |
| TCGA-YY-A8LH | 2016 | Alive  | 4688.35        | Low    |
| TCGA-L1-A7W4 | 278  | Dead   | 4776.67        | Low    |
| TCGA-XD-AAUG | 420  | Alive  | 4908.11        | Low    |
| TCGA-IB-7897 | 486  | Dead   | 5229.49        | Low    |
| TCGA-HV-A7OL | 252  | Alive  | 5260.63        | Low    |
| TCGA-2J-AABU | 277  | Dead   | 5587.34        | Low    |
| TCGA-IB-7888 | 1332 | Dead   | 5741.88        | Low    |
| TCGA-HV-A5A6 | 2036 | Dead   | 5768.74        | Low    |
| TCGA-HZ-7924 | 840  | Alive  | 5809.23        | Low    |
| TCGA-HV-AA8X | 532  | Dead   | 6011.24        | Low    |
| TCGA-FB-AAQ2 | 153  | Dead   | 6094.93        | Low    |
| TCGA-HZ-A8P1 | 7    | Alive  | 6179.04        | Low    |
| TCGA-FB-AAQ6 | 244  | Dead   | 6257.28        | Low    |
| TCGA-H8-A6C1 | 671  | Alive  | 6317.89        | Low    |
| TCGA-IB-7647 | 666  | Dead   | 6349.45        | Low    |
| TCGA-YH-A8SY | 388  | Alive  | 6507.59        | Low    |
| TCGA-2J-AABO | 440  | Alive  | 6709.94        | Low    |
| TCGA-HZ-A49H | 491  | Alive  | 7039.62        | Low    |
| TCGA-HZ-8001 | 706  | Alive  | 7123.93        | Low    |
| TCGA-IB-7887 | 110  | Dead   | 7208.2         | Low    |
| TCGA-M8-A5N4 | 584  | Alive  | 7436.53        | Low    |
| TCGA-FB-A5VM | 498  | Dead   | 7870.11        | Low    |
| TCGA-HZ-A77Q | 33   | Alive  | 7876.62        | Low    |

|              |      |       |          |      |
|--------------|------|-------|----------|------|
| TCGA-HV-A5A4 | 232  | Alive | 7928     | Low  |
| TCGA-IB-AAUV | 404  | Alive | 8199.59  | Low  |
| TCGA-HZ-A77P | 330  | Alive | 8412.58  | Low  |
| TCGA-IB-7645 | 1502 | Dead  | 8462.79  | Low  |
| TCGA-IB-7886 | 123  | Dead  | 8649.31  | Low  |
| TCGA-F2-A8YN | 517  | Alive | 8732.08  | Low  |
| TCGA-IB-A5SP | 482  | Alive | 9206.7   | Low  |
| TCGA-IB-7644 | 394  | Dead  | 9437.12  | Low  |
| TCGA-3A-A9IB | 224  | Dead  | 9727.7   | Low  |
| TCGA-IB-AAUM | 8    | Alive | 9736.92  | High |
| TCGA-2J-AAB1 | 66   | Dead  | 9841.95  | High |
| TCGA-Q3-A5QY | 416  | Alive | 9908.15  | High |
| TCGA-IB-8127 | 522  | Alive | 10156.83 | High |
| TCGA-HZ-7920 | 236  | Dead  | 10413.23 | High |
| TCGA-OE-A75W | 267  | Dead  | 11076.46 | High |
| TCGA-HZ-8317 | 378  | Dead  | 11114.06 | High |
| TCGA-HZ-A9TJ | 603  | Alive | 11400.16 | High |
| TCGA-US-A779 | 511  | Dead  | 12075.49 | High |
| TCGA-2L-AAQA | 143  | Dead  | 12522.02 | High |
| TCGA-2J-AABT | 319  | Alive | 12588.24 | High |
| TCGA-2J-AABE | 676  | Alive | 12628.33 | High |
| TCGA-2J-AAB6 | 293  | Dead  | 12734.5  | High |
| TCGA-3A-A9IC | 738  | Dead  | 12843.46 | High |
| TCGA-F2-6880 | 295  | Alive | 12877.57 | High |
| TCGA-F2-A44G | 233  | Dead  | 13081.68 | High |
| TCGA-IB-7654 | 476  | Dead  | 13128.45 | High |
| TCGA-FB-A545 | 732  | Dead  | 13270.25 | High |
| TCGA-2L-AAQJ | 394  | Dead  | 13295.54 | High |
| TCGA-XD-AAUL | 498  | Alive | 13317.26 | High |
| TCGA-IB-7885 | 1257 | Alive | 13350.34 | High |
| TCGA-IB-A5SQ | 219  | Dead  | 13569.78 | High |
| TCGA-HZ-8315 | 299  | Dead  | 14132.15 | High |
| TCGA-IB-8126 | 462  | Alive | 14370.9  | High |
| TCGA-H6-8124 | 392  | Alive | 14461.94 | High |
| TCGA-HZ-7919 | 593  | Dead  | 14492.59 | High |
| TCGA-RB-A7B8 | 466  | Dead  | 15006.57 | High |
| TCGA-IB-AAUN | 144  | Dead  | 15283.87 | High |
| TCGA-IB-AAUS | 225  | Alive | 15290.54 | High |
| TCGA-S4-A8RP | 702  | Dead  | 15678.67 | High |
| TCGA-HZ-8003 | 596  | Dead  | 15751.44 | High |
| TCGA-IB-A5SO | 365  | Dead  | 15827.59 | High |
| TCGA-FB-A78T | 375  | Dead  | 16106.12 | High |
| TCGA-IB-AAUO | 239  | Dead  | 16143.88 | High |
| TCGA-2J-AABH | 1287 | Alive | 17129.36 | High |
| TCGA-2J-AABF | 691  | Dead  | 17151.77 | High |
| TCGA-IB-A7LX | 250  | Dead  | 17863.21 | High |
| TCGA-FB-AAPZ | 716  | Alive | 18144.1  | High |
| TCGA-HZ-7922 | 4    | Alive | 18801.71 | High |
| TCGA-F2-A44H | 586  | Alive | 19079.42 | High |
| TCGA-3A-A9IX | 1037 | Alive | 19274.32 | High |
| TCGA-HZ-7926 | 518  | Dead  | 19388.49 | High |
| TCGA-YB-A89D | 350  | Alive | 19501.03 | High |
| TCGA-FB-AAPS | 228  | Alive | 20690.34 | High |
| TCGA-US-A774 | 695  | Dead  | 20886.74 | High |
| TCGA-PZ-A5RE | 470  | Dead  | 21074.61 | High |
| TCGA-S4-A8RO | 525  | Alive | 21572.98 | High |
| TCGA-3A-A9J0 | 743  | Alive | 21613.94 | High |
| TCGA-US-A77E | 430  | Dead  | 21795.63 | High |
| TCGA-IB-AAUU | 245  | Alive | 21932.25 | High |
| TCGA-XD-AAUI | 366  | Dead  | 22054.98 | High |
| TCGA-IB-7646 | 145  | Dead  | 22161.93 | High |
| TCGA-HV-A5A3 | 128  | Dead  | 22572.62 | High |
| TCGA-RB-AA9M | 286  | Alive | 23967.81 | High |



|              |      |       |          |      |
|--------------|------|-------|----------|------|
| TCGA-3A-A9IZ | 308  | Dead  | 24070.63 | High |
| TCGA-HZ-7923 | 314  | Alive | 24675.28 | High |
| TCGA-3A-A9IH | 1021 | Alive | 24914.14 | High |
| TCGA-XN-A8T3 | 951  | Alive | 24935.13 | High |
| TCGA-LB-A8F3 | 379  | Alive | 25001.02 | High |
| TCGA-FB-AAPY | 1059 | Dead  | 25192.31 | High |
| TCGA-3A-A9IU | 458  | Dead  | 25219.68 | High |
| TCGA-HZ-A770 | 160  | Dead  | 25311.31 | High |
| TCGA-FB-A4P6 | 767  | Alive | 25506.81 | High |
| TCGA-H6-A45N | 421  | Dead  | 25839.44 | High |
| TCGA-US-A77J | 568  | Dead  | 26733.86 | High |
| TCGA-IB-7889 | 481  | Dead  | 26952.62 | High |
| TCGA-2L-AAQL | 292  | Dead  | 27025.79 | High |
| TCGA-3E-AAAY | 2285 | Alive | 27438.32 | High |
| TCGA-IB-A5SS | 460  | Dead  | 27680.8  | High |
| TCGA-HZ-7918 | 969  | Alive | 27937.01 | High |
| TCGA-2J-AABK | 484  | Alive | 28105.33 | High |
| TCGA-F2-7273 | 592  | Dead  | 28580.44 | High |
| TCGA-FB-A4P5 | 179  | Dead  | 29006.72 | High |
| TCGA-2L-AAQM | 1383 | Alive | 29088.43 | High |
| TCGA-HZ-8636 | 545  | Dead  | 29496.46 | High |
| TCGA-IB-7651 | 603  | Dead  | 29782.79 | High |
| TCGA-IB-AAUQ | 183  | Dead  | 31128.83 | High |
| TCGA-HZ-8002 | 366  | Dead  | 32323.35 | High |
| TCGA-F2-A7TX | 95   | Dead  | 33146    | High |
| TCGA-FB-AAPQ | 1130 | Dead  | 33150.55 | High |
| TCGA-IB-7652 | 1116 | Alive | 33716.41 | High |
| TCGA-RL-AAAS | 9    | Alive | 33788.32 | High |
| TCGA-2J-AABR | 438  | Alive | 35384.04 | High |
| TCGA-IB-7893 | 117  | Dead  | 35603.45 | High |
| TCGA-2L-AAQI | 103  | Dead  | 39661.07 | High |
| TCGA-F2-7276 | 216  | Dead  | 39898.19 | High |
| TCGA-IB-AAUW | 230  | Dead  | 40794.34 | High |
| TCGA-IB-A6UG | 41   | Dead  | 42115.01 | High |
| TCGA-3A-A9I9 | 634  | Dead  | 42269.69 | High |
| TCGA-IB-7891 | 913  | Dead  | 44550.66 | High |
| TCGA-HZ-8005 | 120  | Dead  | 44715.83 | High |
| TCGA-2J-AABV | 652  | Dead  | 46651.97 | High |
| TCGA-LB-A9Q5 | 313  | Dead  | 46887.42 | High |
| TCGA-FB-AAQ3 | 31   | Dead  | 47218.68 | High |
| TCGA-2J-AAB9 | 627  | Dead  | 47747.05 | High |
| TCGA-IB-7890 | 598  | Dead  | 49693.05 | High |
| TCGA-IB-A6UF | 666  | Alive | 53108.57 | High |
| TCGA-2J-AAB4 | 729  | Alive | 54838.38 | High |
| TCGA-IB-7649 | 467  | Dead  | 61621.51 | High |
| TCGA-IB-AAUT | 287  | Alive | 63261.96 | High |
| TCGA-HZ-A49G | 660  | Alive | 67481.4  | High |
| TCGA-FB-AAQ1 | 123  | Dead  | 68175.37 | High |
| TCGA-HV-AA8V | 920  | Alive | 70061.59 | High |
| TCGA-HV-A5A5 | 289  | Alive | 73456.38 | High |
| TCGA-3A-A9I5 | 1794 | Alive | 96867.35 | High |

**Table S4. PCR primers**

|               |                           |
|---------------|---------------------------|
| mSPP1-F1      | GCCTGTTTGGCATTGCCTCCTC    |
| mSPP1-B1      | CACAGCATTCTGTGGCGCAAGG    |
| mCD44-F       | ACTCAAGTGCGAACCAGGACAG    |
| mCD44-B       | GCTTTTCTTCTGCCACACC       |
| mSpp1-ChIP-1F | GAGGAAACCAGCCAAGGTAAGC    |
| mSpp1-ChIP-1B | CAAAAAGACCAGAACAGCACGAG   |
| mSpp1-ChIP-2F | AGGGTCTGAAAGTTCTGCCGAG    |
| mSpp1-ChIP-2B | GGGGATGAAAGGTATGGATTCTCC  |
| mSpp1-ChIP3-F | AGCAGGGTTTGGCAAGTAGCAC    |
| mSpp1-ChIP3-B | TCCCGAAATGGAGAACACAGGC    |
| mSpp1-ChIP-4F | TTAACCCCAAGTGGCTACACG     |
| mSpp1-ChIP-4B | TCATGTTGAAGTCCCCTTAAAGTAG |

**Table S5. Flow cytometry antibodies**

| <b>Antibody</b>                    | <b>Source</b> | <b>Clone</b> | <b>Cat Number</b> | <b>Application</b> |
|------------------------------------|---------------|--------------|-------------------|--------------------|
| PE-Cy7 anti-mouse CD45.2           | Biolegend     | 104          | 109830            | Flow Cytometry     |
| FITC anti-mouse CD4                | Biolegend     | GK1.5        | 100406            | Flow Cytometry     |
| PerCP anti-mouse CD8               | Biolegend     | 53-6.7       | 100732            | Flow Cytometry     |
| APC anti-mouse PD-1                | Biolegend     | 29F.1A12     | 135210            | Flow Cytometry     |
| PE anti-mouse FasL                 | Biolegend     | Kay-10       | 106805            | Flow Cytometry     |
| FITC anti-human/mouse CD11b        | Biolegend     | M1/70        | 101206            | Flow Cytometry     |
| PerCP anti-mouse Gr1               | Biolegend     | RB6-8C5      | 108426            | Flow Cytometry     |
| APC anti-mouse PD-L1               | Biolegend     | 10F.9G2      | 124312            | Flow Cytometry     |
| AF700 anti-mouse Ly6G              | Biolegend     | 1A8          | 127622            | Flow Cytometry     |
| PerCP anti-mouse Ly6C              | Biolegend     | HK1.4        | 128028            | Flow Cytometry     |
| PE-Cy7 anti-mouse F4/80            | Biolegend     | BM8          | 123114            | Flow Cytometry     |
| AF700 anti-mouse CD206             | Biolegend     | C068C2       | 141734            | Flow Cytometry     |
| FITC anti-mouse Fas                | BD Pharmingen | Jo2          | 554257            | Flow Cytometry     |
| PE anti-mouse OPN                  | R&D Systems   | N/A          | IC808P            | Flow Cytometry     |
| Pacific Blue anti-human/mouse GzmB | Biolegend     | GB11         | 515408            | Flow Cytometry     |
| FITC mouse IgG                     | Biolegend     | Poly4060     | 406001            | Flow Cytometry     |
| APC Armenian Hamster IgG           | Biolegend     | HTK888       | 400912            | Flow Cytometry     |

**Table S6: Two-factor ANOVA results of WDR5-47 and anti-PD-1 immunotherapy on tumor weight and size**

| Outcome      | Effect in Model                    | Level of WDR5-047 | Level of anti-PD-1 | Mean      | SD       | F-value  | p-value |         |
|--------------|------------------------------------|-------------------|--------------------|-----------|----------|----------|---------|---------|
| Tumor Weight | WDR5-047 status                    | WDR5-047          |                    | 0.2256    | 0.1051   | 75.88    | <0.0001 |         |
|              |                                    | Control           |                    | 0.5988    | 0.2473   |          |         |         |
|              | anti-PD-1 status                   |                   |                    | anti-PD-1 | 0.2788   | 0.1541   | 38.82   | <0.0001 |
|              |                                    |                   |                    | Control   | 0.5456   | 0.2911   |         |         |
|              | WDR5-047 Status x anti-PD-1 status | WDR5-047          | WDR5-047           | anti-PD-1 | 0.1488   | 0.0380   | 6.97    | 0.0134  |
|              |                                    |                   |                    | Control   | 0.3025   | 0.0935   |         |         |
| Control      |                                    | anti-PD-1         | 0.4088             | 0.1040    |          |          |         |         |
|              |                                    | Control           | 0.7888             | 0.1942    |          |          |         |         |
| Tumor Size   | WDR5-047 Status                    | WDR5-047          |                    | 213.4229  | 123.4092 | 58.32    | <0.0001 |         |
|              |                                    | Control           |                    | 851.5887  | 506.8368 |          |         |         |
|              | anti-PD-1 status                   |                   |                    | anti-PD-1 | 300.7270 | 194.1639 | 30.77   | <0.0001 |
|              |                                    |                   |                    | Control   | 764.2846 | 580.5266 |         |         |
|              | WDR5-047 Status x anti-PD-1 status | WDR5-047          | WDR5-047           | anti-PD-1 | 139.5968 | 31.4927  | 14.29   | 0.0008  |
|              |                                    |                   |                    | Control   | 287.2491 | 138.5125 |         |         |
| Control      |                                    | anti-PD-1         | 461.8573           | 143.0007  |          |          |         |         |
|              |                                    | Control           | 1241.3201          | 427.5947  |          |          |         |         |

**Table S7 Two-factor ANOVA results of WT (Scramble)/*Spp1* KO and anti-PD-1 immunotherapy on tumor weight and size.**

| Outcome        | Effect in Model              | Level of Cell Type | Level of anti-PD-1 | Mean   | SD     | F-value | p-value |
|----------------|------------------------------|--------------------|--------------------|--------|--------|---------|---------|
| Tumor Weight   | Cell type                    | Scramble           |                    | 0.29   | 0.14   | 27.01   | <0.0001 |
|                |                              | <i>Spp1</i> KO     |                    | 0.14   | 0.04   |         |         |
|                | anti-PD-1 status             |                    | anti-PD-1          | 0.16   | 0.05   | 14.20   | 0.0011  |
|                |                              |                    | IgG                | 0.25   | 0.14   |         |         |
|                | Cell type x anti-PD-1 status | Scramble           | anti-PD-1          | 0.21   | 0.02   | 5.28    | 0.0319  |
|                |                              |                    | IgG                | 0.38   | 0.15   |         |         |
| <i>Spp1</i> KO |                              | anti-PD-1          | 0.12               | 0.03   |        |         |         |
|                |                              | IgG                | 0.17               | 0.04   |        |         |         |
| Tumor Size     | Cell type                    | Scramble           |                    | 416.76 | 170.39 | 60.07   | <0.0001 |
|                |                              | <i>Spp1</i> KO     |                    | 147.77 | 59.95  |         |         |
|                | anti-PD-1 status             |                    | anti-PD-1          | 180.43 | 125.87 | 21.53   | 0.0001  |
|                |                              |                    | IgG                | 322.13 | 190.77 |         |         |
|                | Cell type x anti-PD-1 status | Scramble           | anti-PD-1          | 305.13 | 97.94  | 2.59    | 0.1227  |
|                |                              |                    | IgG                | 522.40 | 161.94 |         |         |
| <i>Spp1</i> KO |                              | anti-PD-1          | 91.54              | 21.79  |        |         |         |
|                |                              | IgG                | 196.96             | 29.20  |        |         |         |
